# Supplementary material for: A novel core–shell multi-walled carbon nanotube@graphene oxide nanoribbon heterostructure as a potential supercapacitor material
Source: Royal Society of Chemistry journal article supplement (doi:10.1039/c3ta12037f), 2013-01-01
Supplement: c3ta12037f.pdf [file c3ta12037f.pdf]

## Electronic Supplementary Information

### Novel Core–Shell Heterostructure of Multi–walled Carbon Nanotube@Graphene Oxide Nanoribbons as the Potential Supercapacitor Material

Lu–Yin Lin,<sup>§a</sup> Min–Hsin Yeh,<sup>§a</sup> Jin–Ting Tsai,<sup>b</sup> Yuan–Han Huang,<sup>b</sup> Chia–Liang Sun,<sup>\*,b,c</sup>  
and Kuo–Chuan Ho<sup>\*\*,a</sup>

<sup>a</sup> Department of Chemical Engineering, National Taiwan University, Taipei 10617, Taiwan

<sup>b</sup> Department of Chemical and Materials Engineering, Chang Gung University, Tao-Yuan 333, Taiwan

<sup>c</sup> Biosensor Group, Biomedical Engineering Research Center, Chang Gung University, Tao-Yuan 333, Taiwan

\* To whom correspondence should be addressed: [sunchialiang@gmail.com](mailto:sunchialiang@gmail.com) (C. L. Sun)

\*\* To whom correspondence should be addressed: [kcho@ntu.edu.tw](mailto:kcho@ntu.edu.tw) (K. C. Ho)

§ These authors contributed equally

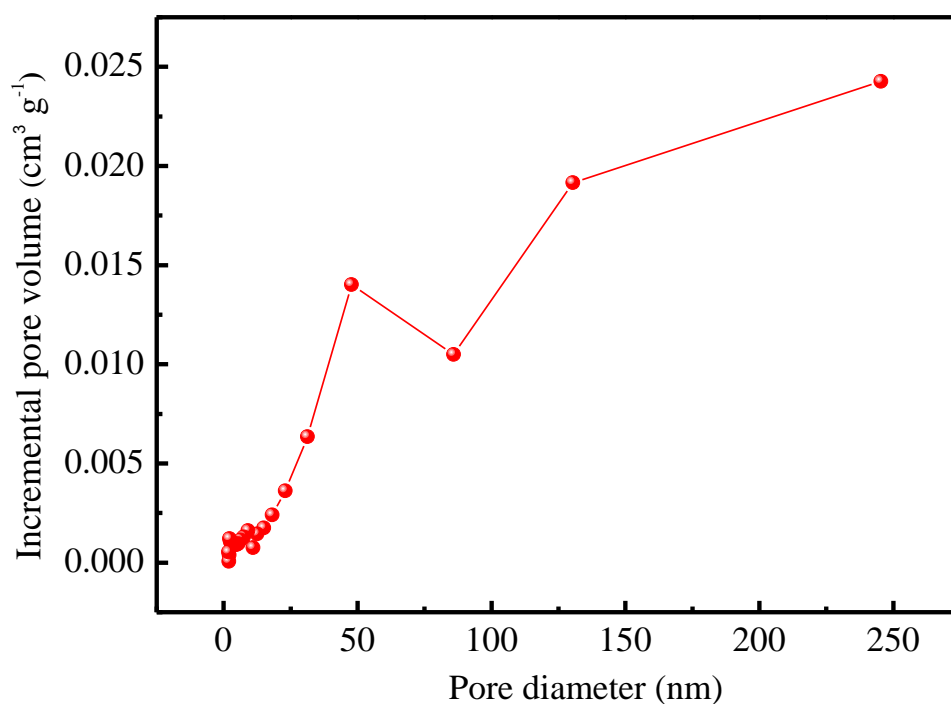

**Figure S1** BJH adsorption pore size distribution of MWCNT@GONR.

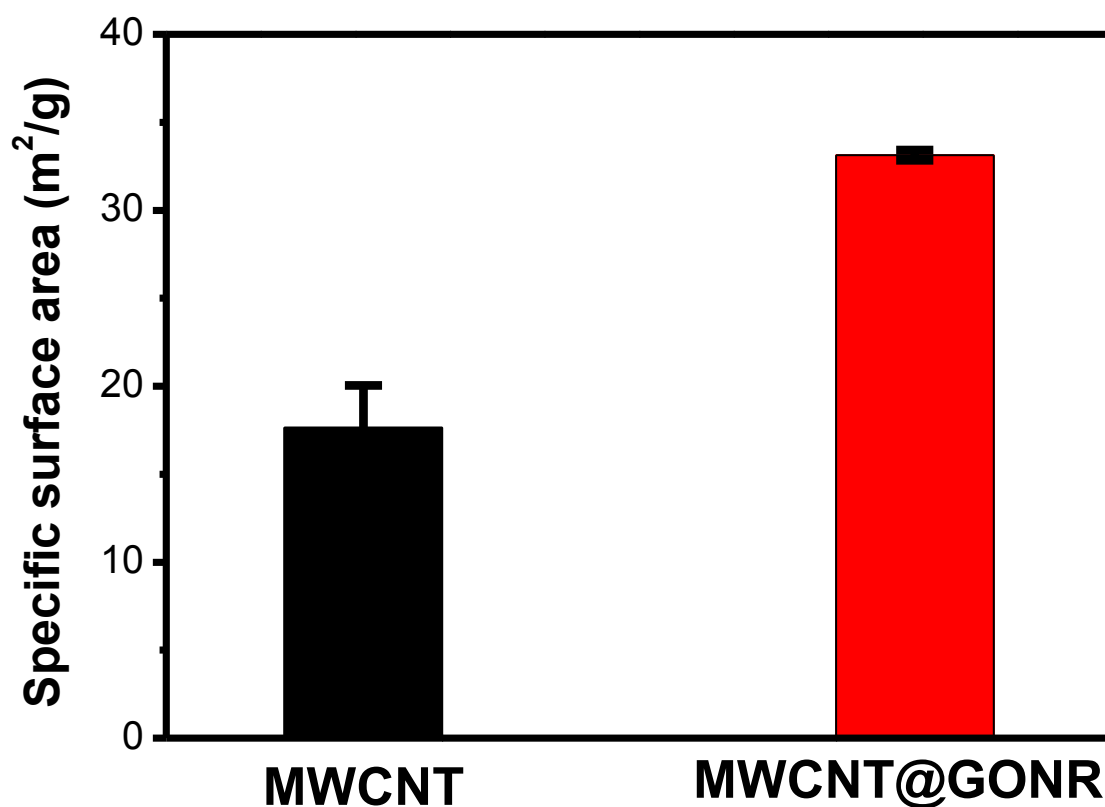

**Figure S2** Comparison of the specific surface area (SSA) values of MWCNT and MWCNT@GONR samples.

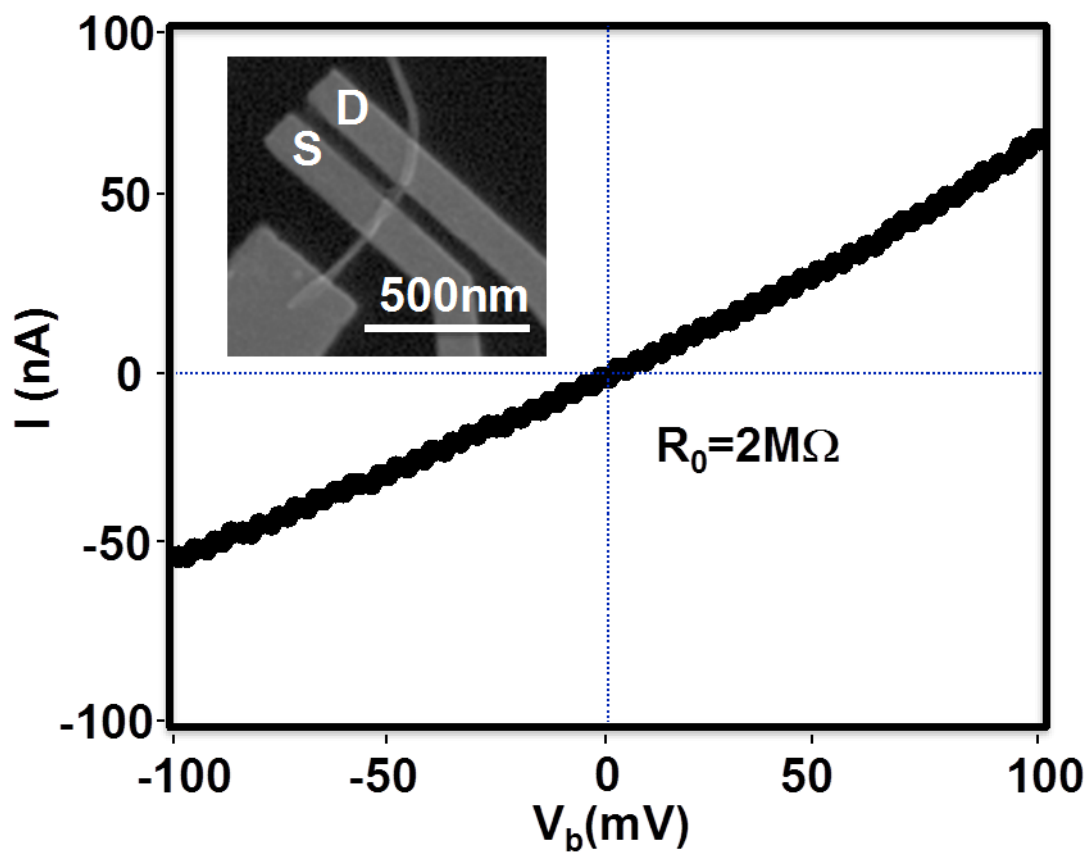

**Figure S3** I-V measurement result of one single GONR and the electrodes were made by e-beam lithography. The resistance is approximately 2 M $\Omega$ .

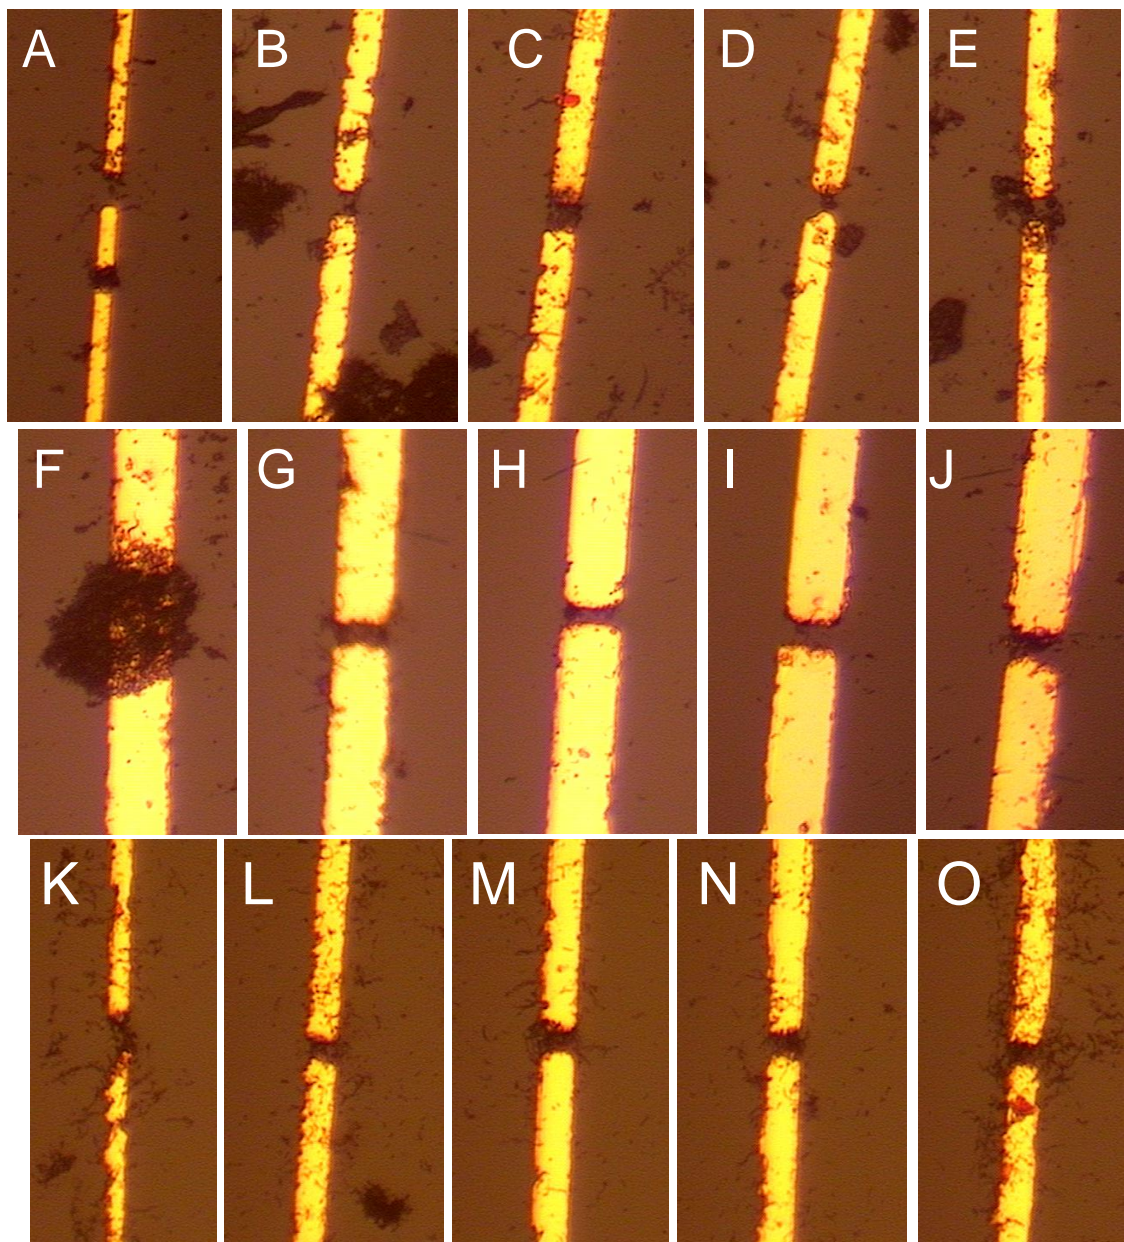

**Figure S4** GONR ensembles between two gold electrodes made by photolithography. The resistance values are approximately several tens of  $M\Omega$ .
